# Supplementary material for: Single-layer HNb3O8 with strong and nearby Lewis and Brønsted acid sites boosts amide bond hydrolysis for urease mimicking
Source: Royal Society of Chemistry journal article supplement (doi:10.1039/d3nr01262j), 2023-01-01
Supplement: d3nr01262j1.pdf [file d3nr01262j1.pdf]

**Supporting information for**

**Single-Layer HNb<sub>3</sub>O<sub>8</sub> with Strong and Nearby Lewis and Brønsted Acid Sites Boosts Amide Bond Hydrolysis for Urease Mimicking**

Guohan Sun,<sup>a,#</sup> Bo Yuan,<sup>a,#</sup> Xinyu Wu,<sup>a</sup> Shun Ying Lau,<sup>a</sup> Linyuan Tian,<sup>a</sup> Jung-Hoon Lee,<sup>b,\*</sup> Keizo Nakagawa<sup>c</sup>, Yung-Kang Peng<sup>a\*</sup>

<sup>a</sup>Department of Chemistry, City University of Hong Kong, Hong Kong, Hong Kong SAR.

<sup>b</sup>Department of Chemistry, Soonchunhyang University, Asan, Korea.

<sup>c</sup>Research Center for Membrane and Film Technology, Graduate School of Science, Technology and Innovation, Kobe University, Kobe, Japan.

#Equal contribution to this work.

\*Correspondence: [ykpeng@cityu.edu.hk](mailto:ykpeng@cityu.edu.hk); [jhlee67@sch.ac.kr](mailto:jhlee67@sch.ac.kr)

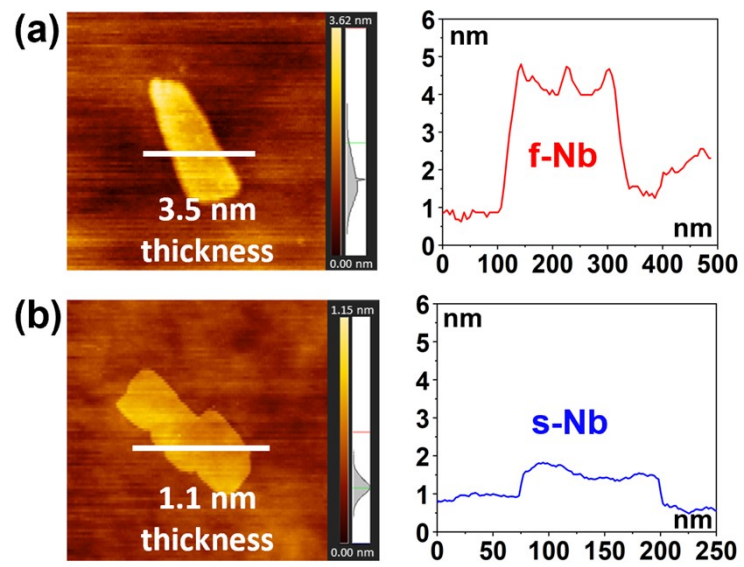

**Figure S1.** AFM images and thickness analysis of (a) f-Nb and (b) s-Nb.

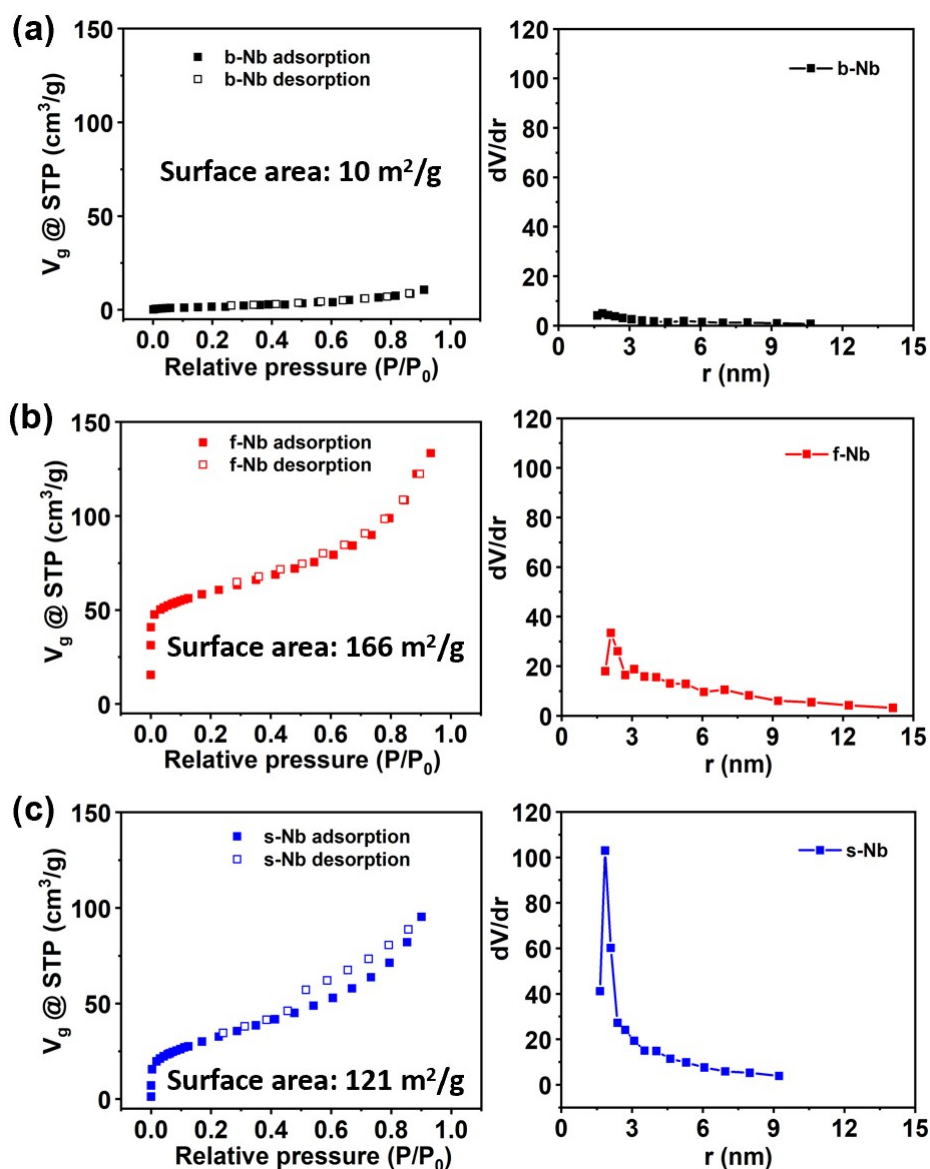

**Figure S2.**  $\text{N}_2$  adsorption-desorption isotherms (left) and pore size distribution (right) of (a) b-Nb, (b) f-Nb, and (c) s-Nb samples.

According to IUPAC classification<sup>[1]</sup>, Type II isotherm observed for b-Nb and f-Nb here implies that both samples are nonporous powders or with pore diameters larger than micropores. While a hysteresis loop and a pore size at around 2 nm can be seen on s-Nb suggests a serious re-stacking between s-Nb samples.

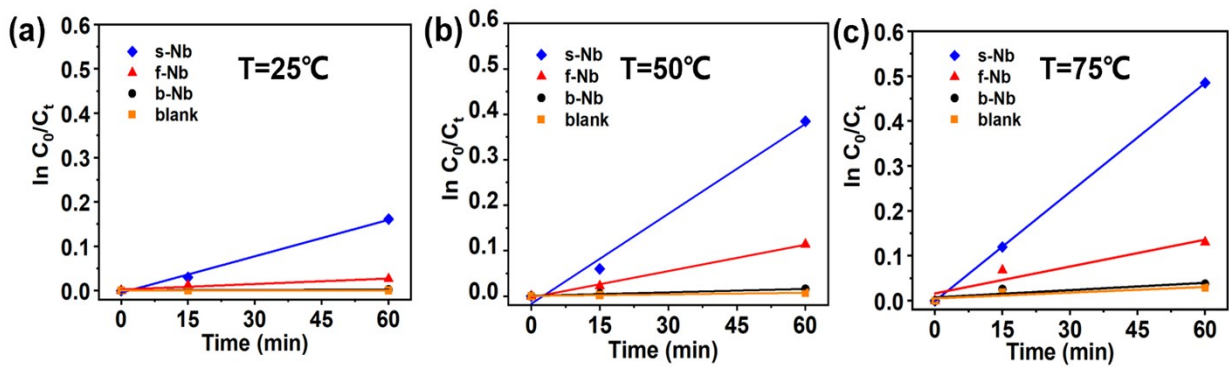

**Figure S3.** Plots of kinetic study over  $\text{HNb}_3\text{O}_8$  samples at elevated temperatures: (a)  $25^\circ\text{C}$ , (b)  $50^\circ\text{C}$ , and (c)  $75^\circ\text{C}$ . See **Table S2** for the obtained  $k$  constants.

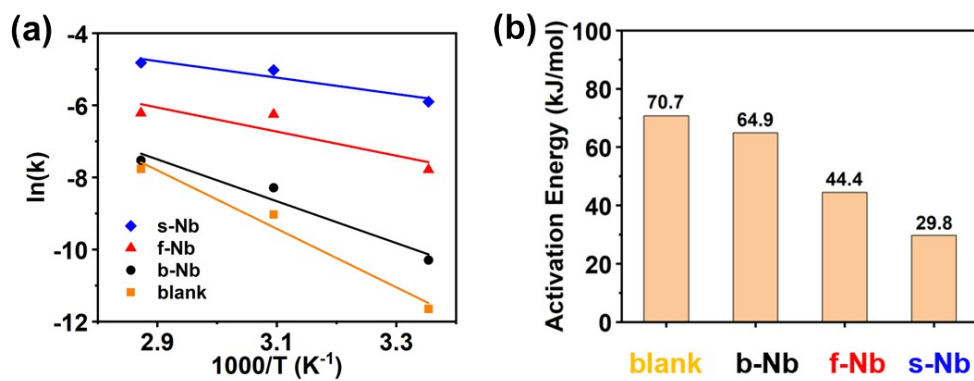

**Figure S4.** (a) Arrhenius plots for  $\text{HNb}_3\text{O}_8$  samples and (b) the comparison of their activation energies ( $E_{A(\text{acetamide})}$ ) with blank.

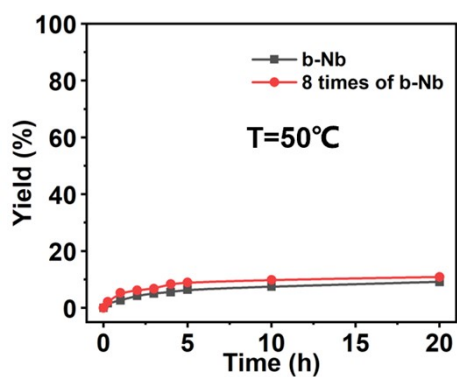

**Figure S5.** Acetamide hydrolysis at 50 °C over 8 times amounts of b-Nb as a function of time.

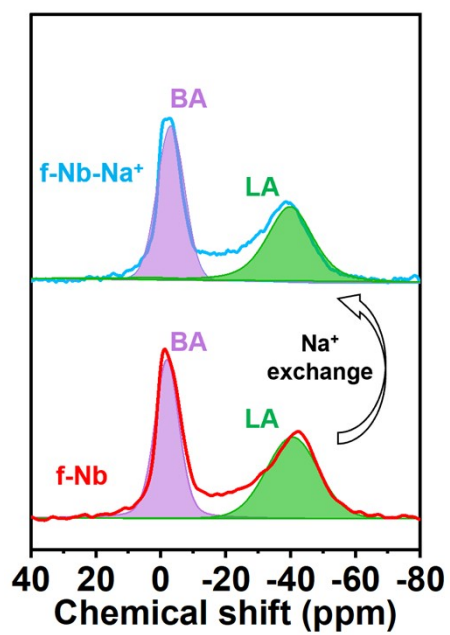

**Figure S6.** The comparison of TMP-<sup>31</sup>P NMR spectra of f-Nb-Na<sup>+</sup> with that of f-Nb.

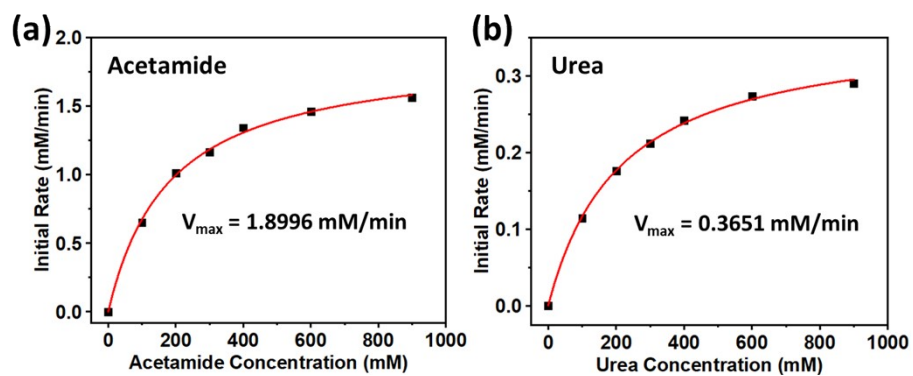

Figure S7. The concentration effect of (a) acetamide and (b) urea for s-Nb sample at 50 °C.

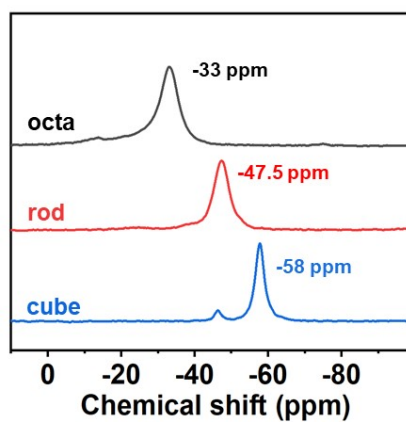

Figure S8. TMP-<sup>31</sup>P NMR of CeO<sub>2</sub> with different morphologies<sup>[2]</sup>.

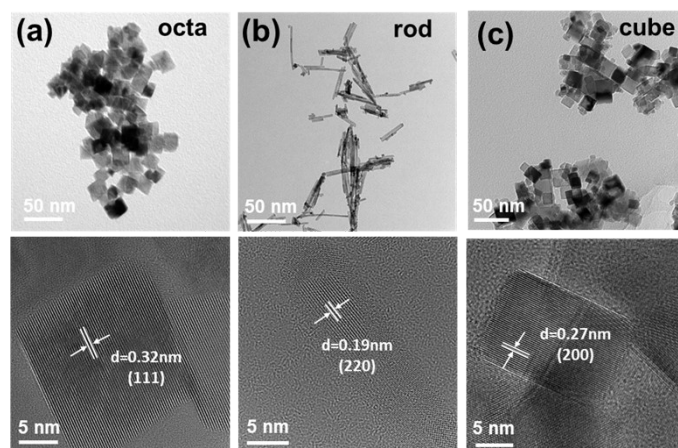

**Figure S9.** TEM and high-resolution TEM of (a) octahedron-, (b) rod-, and (c) cube-shaped CeO<sub>2</sub> samples.

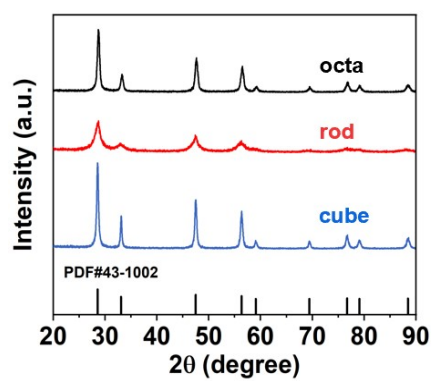

**Figure S10.** XRD spectra of CeO<sub>2</sub> samples.

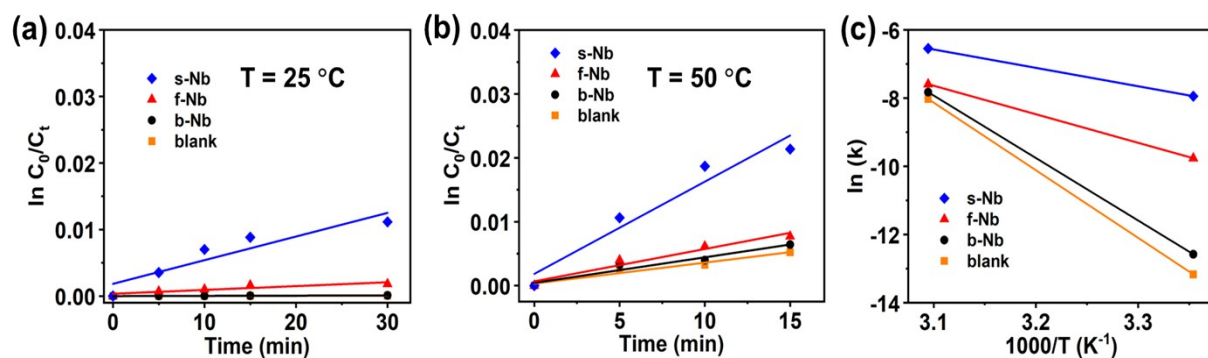

**Figure S11.** (a, b) Plots of kinetic study over  $\text{HNb}_3\text{O}_8$  samples at elevated temperatures for urea (See **Table S4** for the obtained  $k$  constants) and (c) their Arrhenius plots.

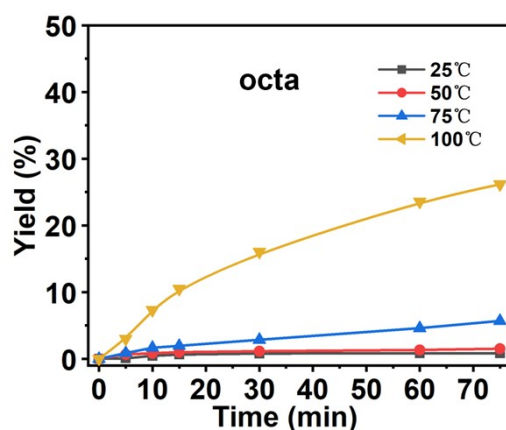

**Figure S12.** Urea hydrolysis at elevated temperatures over octahedral  $\text{CeO}_2$  sample.



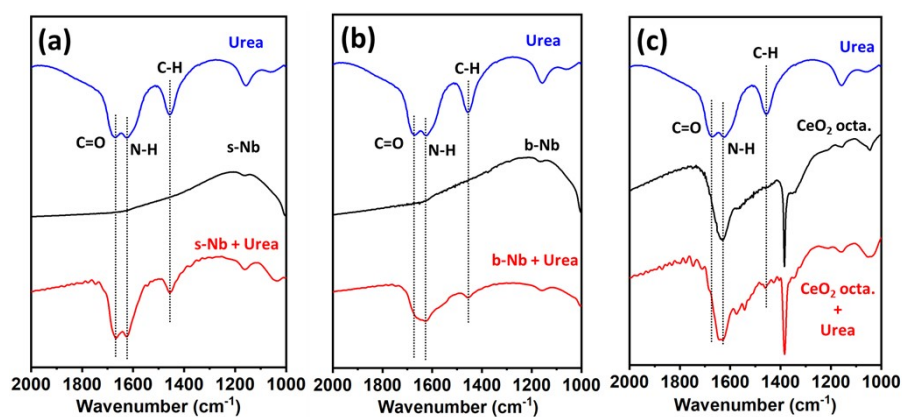

**Figure S13.** Infrared spectral comparison of (a) s-Nb, (b) b-Nb, and (c) CeO<sub>2</sub> octa. samples before and after urea adsorption.

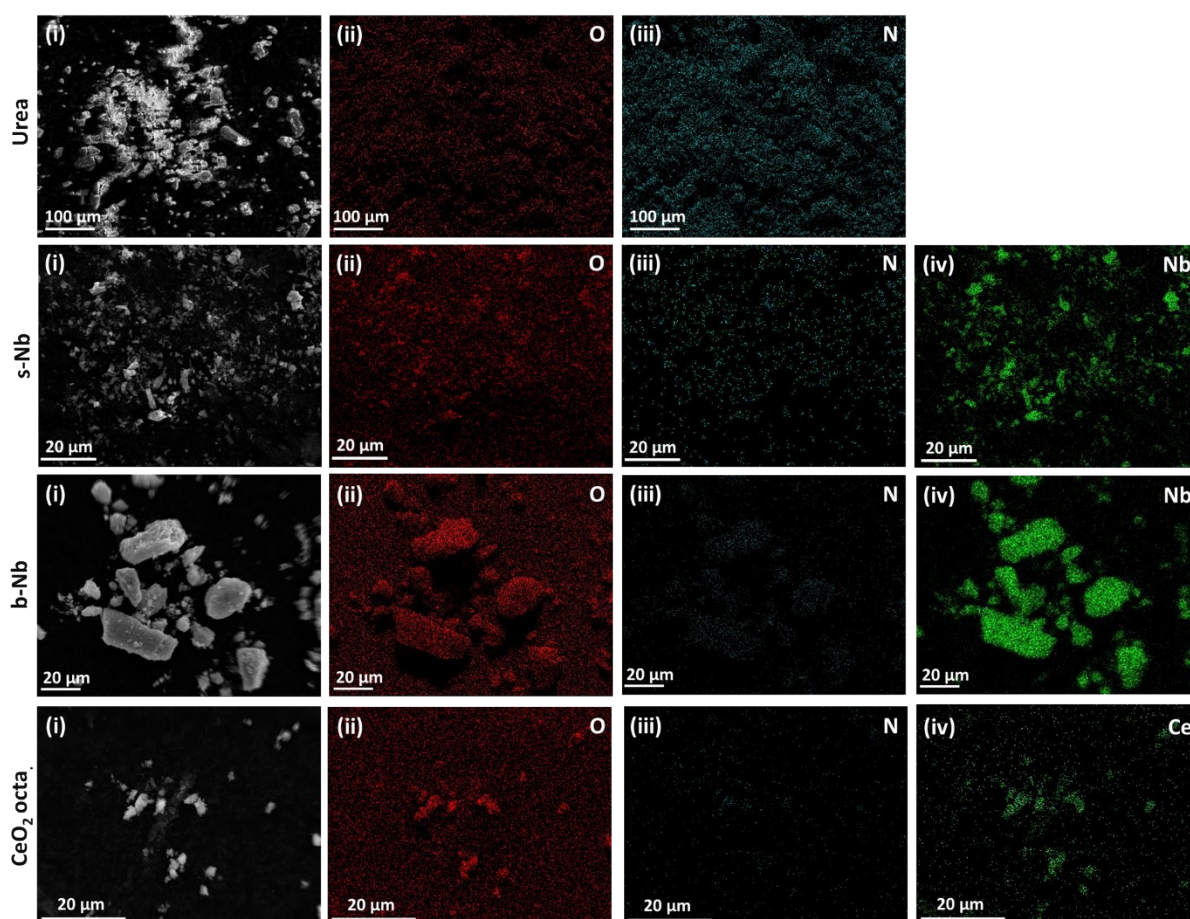

**Figure S14.** The scanning electron microscopy (i) image and elemental (ii) O, (iii) N, (iv) Nb/Ce mapping of urea and urea-adsorbed s-Nb, b-Nb, and CeO<sub>2</sub> octa. samples.

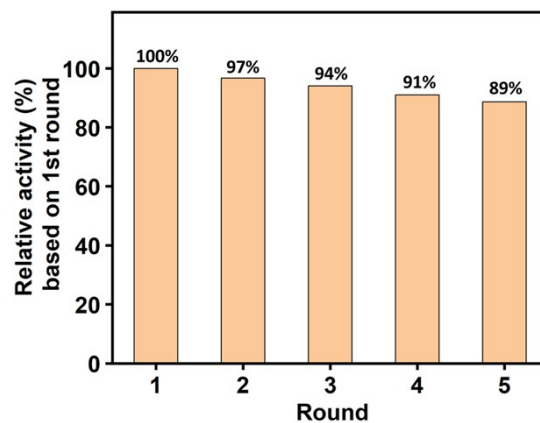

**Figure S15.** (a) The recyclability test for s-Nb in urea hydrolysis at 50 °C for five consecutive rounds. The activity was analyzed after 75 mins of reaction and the activity of the first round was set as 100% for comparison.

**Table S1.** The time-dependent yield (%) of NH<sub>3</sub> from acetamide hydrolysis over HNb<sub>3</sub>O<sub>8</sub> samples at elevated temperatures.

| Sample | Time (h)         | 0.25     | 1        | 2        | 3        | 4        | 5        | 10       | 20       |
|--------|------------------|----------|----------|----------|----------|----------|----------|----------|----------|
|        | Temperature (°C) |          |          |          |          |          |          |          |          |
| blank  | 25               | 0.00014  | 0.04878  | 0.35173  | 1.28883  | 1.45576  | 1.61853  | 2.10418  | 2.25249  |
|        | 50               | 0.25034  | 0.73454  | 1.2669   | 1.52771  | 1.60133  | 1.78039  | 2.31459  | 2.47774  |
|        | 75               | 1.90526  | 2.86776  | 3.35173  | 3.58883  | 3.65576  | 3.81853  | 4.30418  | 4.45249  |
|        | 100              | 3.68126  | 4.34776  | 4.83173  | 5.06883  | 5.13576  | 5.29853  | 5.78418  | 5.93249  |
| b-Nb   | 25               | 0.11600  | 0.22177  | 0.84983  | 2.02536  | 3.01495  | 4.0493   | 5.90798  | 8.92722  |
|        | 50               | 0.58013  | 1.55674  | 2.51349  | 3.10885  | 5.47559  | 6.24916  | 8.53267  | 10.12682 |
|        | 75               | 2.55023  | 3.68052  | 3.68015  | 4.28601  | 5.82921  | 8.62594  | 11.07078 | 12.74352 |
|        | 100              | 4.40368  | 5.56034  | 7.12067  | 8.23892  | 8.71393  | 9.02731  | 10.40835 | 15.36186 |
| f-Nb   | 25               | 1.17300  | 2.61024  | 9.26354  | 14.53576 | 17.57849 | 20.24923 | 22.66994 | 23.71737 |
|        | 50               | 2.22063  | 10.78190 | 19.23142 | 23.35812 | 25.25948 | 25.79973 | 30.43695 | 32.20002 |
|        | 75               | 6.60734  | 12.25780 | 20.43735 | 22.40198 | 27.43096 | 30.89979 | 47.34301 | 53.56032 |
|        | 100              | 16.02377 | 19.72947 | 26.25759 | 26.72187 | 27.93464 | 30.21385 | 36.71946 | 56.85613 |
| s-Nb   | 25               | 2.95023  | 14.87722 | 20.60297 | 25.53202 | 27.20023 | 30.87591 | 40.55553 | 49.52687 |
|        | 50               | 5.82231  | 31.92427 | 38.19994 | 41.78398 | 44.01576 | 46.73715 | 55.86686 | 65.62126 |
|        | 75               | 11.30043 | 38.44515 | 51.91944 | 56.45697 | 63.26165 | 65.90023 | 73.48153 | 77.87113 |
|        | 100              | 33.30041 | 42.00689 | 51.97733 | 61.86437 | 64.9194  | 66.18161 | 80.89721 | 95.04683 |

**Table S2.** The k constants obtained for HNb<sub>3</sub>O<sub>8</sub> samples at elevated temperatures in acetamide hydrolysis.

| Sample | k constant (min <sup>-1</sup> ) |            |            |
|--------|---------------------------------|------------|------------|
|        | 25°C                            | 50°C       | 75°C       |
| blank  | 8.7503E-06                      | 1.1949E-04 | 4.2388E-04 |
| b-Nb   | 3.3897E-05                      | 2.5178E-04 | 5.4051E-04 |
| f-Nb   | 4.1422E-04                      | 1.9300E-03 | 2.0000E-03 |
| s-Nb   | 2.7400E-03                      | 6.5900E-03 | 8.0900E-03 |

**Table S3.** The comparison of activity of homo-/hetero-catalysts reported in acetamide and urea hydrolysis.

| Entry | Substrate | Catalyst                                                                                  | Substrate Concentration          | Amount of catalyst         | Temp. (°C) | pH  | Reported Activity                                                     | Rate (mM s <sup>-1</sup> ) | Reference                                 |
|-------|-----------|-------------------------------------------------------------------------------------------|----------------------------------|----------------------------|------------|-----|-----------------------------------------------------------------------|----------------------------|-------------------------------------------|
| 1     | Acetamide | Nb <sub>2</sub> O <sub>5</sub>                                                            | 1 mmol acetamide in 5 mmol water | 50 mg                      | 100        | -   | <sup>[a]</sup> Initial rate: 1.63 mol g <sup>-1</sup> h <sup>-1</sup> | 4.538 x 10 <sup>-2</sup>   | Catal. Sci. Technol., 2021, 11, 1949–1960 |
| 2     |           | Single layer HNb <sub>3</sub> O <sub>8</sub> (s-Nb)                                       | 0.3 M                            | 1 mg/mL                    | 100        | -   | <sup>[b]</sup> k constant: 2.2 x 10 <sup>-2</sup> min <sup>-1</sup>   | 1.11 x 10 <sup>-1</sup>    | <b>This work</b>                          |
| 3     | Urea      | Urease                                                                                    | 0.02 M                           | 8.39 x 10 <sup>-6</sup> mM | 25         | 7.4 | <sup>[c]</sup> 2.2 x 10 <sup>-2</sup> mM s <sup>-1</sup>              | 2.2 x 10 <sup>-2</sup>     | Nanoscale, 2018, 10, 13074                |
| 4     |           | CeO <sub>2-x</sub> nanorods                                                               | 0.3 M                            | 1 mg/mL                    | 25         | 7.4 | <sup>[c]</sup> 0.9 x 10 <sup>-4</sup> mM s <sup>-1</sup>              | 0.9 x 10 <sup>-4</sup>     |                                           |
| 5     |           | Single layer HNb <sub>3</sub> O <sub>8</sub> (s-Nb)                                       | 0.3 M                            | 1 mg/mL                    | 25         | -   | <sup>[b]</sup> k constant: 3.554 x 10 <sup>-3</sup> min <sup>-1</sup> | 1.777 x 10 <sup>-3</sup>   | <b>This work</b>                          |
| 6     |           | [Co(tren)Cl <sub>2</sub> ]Cl (molecular catalyst)                                         | 0.01 M                           | 4.5 x 10 <sup>-4</sup> M   | 45         | 9.0 | <sup>[b]</sup> k constant: 3.5 x 10 <sup>-3</sup> s <sup>-1</sup>     | 3.5 x 10 <sup>-4</sup>     | Eur. J. Inorg. Chem. 2018, 5058–5067      |
| 7     |           | Ni <sub>2</sub> L <sub>2</sub> (OAc) <sub>2</sub> (H <sub>2</sub> O) (molecular catalyst) | 0.05 M                           | 2 x 10 <sup>-3</sup> M     | 25         | -   | <sup>[b]</sup> k constant: 13.73 s <sup>-1</sup>                      | 686.5                      | Dalton Trans., 2021, 50, 4848–4858        |

[a] The initial rate (mol g<sup>-1</sup> h<sup>-1</sup>) was converted to Rate (mM s<sup>-1</sup>) by multiplying the catalyst weight (50 mg).

[b] The k constant (s<sup>-1</sup> or min<sup>-1</sup>) was converted to Rate (mM s<sup>-1</sup>) using “Rate = k [substrate]” as hydrolysis is a pseudo-first-order reaction.

[c] Extracted from the linear concentration-dependent range in the corresponding Michaelis–Menten plot.

**Table S3** compares the activity of homo-/hetero-catalysts in acetamide (entries 1 and 2) and urea (entries 3–7) hydrolysis. Since urea can undergo the elimination pathway and thermal decomposition at temperature > 75 °C, we only considered catalysts used at low temperature (< 50 °C) for comparison. Based on the calculated rate (mM s<sup>-1</sup>), s-Nb outperforms not only the reported solid catalysts Nb<sub>2</sub>O<sub>5</sub> (entry 1) and CeO<sub>2-x</sub> nanorods (entry 4) in acetamide and urea hydrolysis, respectively, but also the molecular catalyst, [Co(tren)Cl<sub>2</sub>]Cl (entry 6), in the latter reaction. While this mimetic is still about 10 times less active than urease at 25 °C (entry 3) as discussed in the maintext. It is interesting to note that the other molecular catalyst, Ni<sub>2</sub>L<sub>2</sub>(OAc)<sub>2</sub>(H<sub>2</sub>O) (entry 7), exhibits a calculated rate (686.5 mM s<sup>-1</sup>) much higher than that of urease (2.2 x 10<sup>-2</sup> mM s<sup>-1</sup>). However, the authors found that this catalyst does not follow the hydrolysis pathway as urease rather they tend to decompose urea into ammonia and cyanate (i.e., the elimination pathway) at 25 °C.

**Table S4.** The time-dependent yield (%) of NH<sub>3</sub> from urea hydrolysis over HNb<sub>3</sub>O<sub>8</sub> samples at elevated temperatures.

| Sample | Time (min)       | 5       | 10      | 15       | 30       | 60       | 75       |
|--------|------------------|---------|---------|----------|----------|----------|----------|
|        | Temperature (°C) |         |         |          |          |          |          |
| blank  | 25               | 0.00100 | 0.00191 | 0.00288  | 0.00575  | 0.00661  | 0.00679  |
|        | 50               | 0.25945 | 0.32725 | 0.52228  | 0.95945  | 0.99783  | 1.03774  |
|        | 75               | 0.39292 | 0.65458 | 0.94988  | 1.8569   | 3.60069  | 4.67533  |
|        | 100              | 2.00011 | 4.31436 | 6.49030  | 12.04813 | 18.58090 | 22.16311 |
| b-Nb   | 25               | 0.00178 | 0.00345 | 0.00519  | 0.01037  | 0.01160  | 0.01168  |
|        | 50               | 0.32693 | 0.39929 | 0.64055  | 1.01019  | 1.19672  | 1.28188  |
|        | 75               | 0.51503 | 0.77956 | 1.13443  | 2.52887  | 4.86926  | 6.06303  |
|        | 100              | 2.63528 | 4.99764 | 8.06326  | 15.18513 | 25.35662 | 26.92249 |
| f-Nb   | 25               | 0.07142 | 0.10237 | 0.16344  | 0.18135  | 0.18191  | 0.18369  |
|        | 50               | 0.39828 | 0.61406 | 0.76758  | 1.23505  | 1.25563  | 1.26975  |
|        | 75               | 0.59993 | 1.09745 | 1.54793  | 2.84928  | 6.12511  | 7.39698  |
|        | 100              | 3.94407 | 7.08741 | 10.50000 | 18.36034 | 28.18250 | 30.96721 |
| s-Nb   | 25               | 0.35365 | 0.69846 | 0.87996  | 1.10862  | 1.82846  | 2.19666  |
|        | 50               | 1.05517 | 1.85113 | 2.11393  | 2.49239  | 3.90141  | 4.38616  |
|        | 75               | 3.17222 | 4.3458  | 4.94694  | 6.72607  | 10.08458 | 11.40415 |
|        | 100              | 6.03636 | 9.99773 | 13.70618 | 22.82206 | 39.54293 | 44.39367 |

**Table S5.** The k constants obtained for HNb<sub>3</sub>O<sub>8</sub> samples at temperatures < 75°C in urea hydrolysis.

| Sample | k constant (min <sup>-1</sup> ) |           |
|--------|---------------------------------|-----------|
|        | 25°C                            | 50°C      |
| blank  | 1.9117E-6                       | 3.2778E-4 |
| b-Nb   | 3.4505E-6                       | 4.0009E-4 |
| f-Nb   | 5.7604E-5                       | 5.0571E-4 |
| s-Nb   | 3.5540E-4                       | 1.4412E-3 |

## References

- 1 K. S. W. Sing, D. H. Everett, R. A. W. Haul, L. Moscou, R. A. Pierotti, J. Rouquerol, T. Siemieniewska, *Pure & Appl. Chem.*, 1985, **57**, 603.
- 2 Z. Tan, G. Li, H. L. Chou, Y. Li, X. Yi, A. H. Mahadi, A. Zheng, S. C. E. Tsang and Y. K. Peng, *ACS Catal.*, 2020, **10**, 4003.
